# Supplementary material for: Water-soluble and highly emissive near-infrared nano-probes by co-assembly of ionic amphiphiles: towards application in cell imaging
Source: Royal Society of Chemistry journal article supplement (doi:10.1039/c9nj01184f), 2019-01-01
Supplement: c9nj01184f1.pdf [file c9nj01184f1.pdf]

## Supporting information

### Water-soluble and highly emissive near-infrared nano-probes by co-assembly of ionic amphiphiles: towards application in cell imaging

Yuzhi Xing<sup>a</sup>, Dahua Li<sup>a</sup>, Bin Dong<sup>a</sup>, Xiaocheng Wang<sup>a</sup>, Chengfeng Wu<sup>a</sup>, Lan Ding<sup>a</sup>, Shixin Zhou<sup>b,\*</sup>, Jian Fan<sup>c</sup> and Bo Song<sup>a,\*</sup>

<sup>a</sup> College of Chemistry, Chemical Engineering and Materials Science, Soochow University, Suzhou 215123, China. Email: songbo@suda.edu.cn

<sup>b</sup> Department of Cell Biology, School of Basic Medical Sciences, Peking University Health Science Center, Beijing 100191, China. Email: zsx@bjmu.edu.cn

<sup>c</sup> Jiangsu Key Laboratory for Carbon-Based Functional Materials & Devices, Soochow University, Suzhou 215123, China.

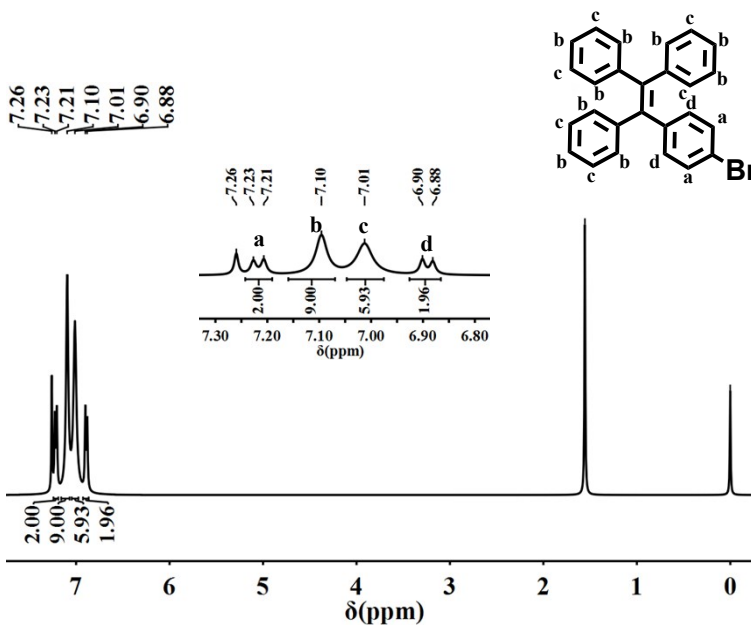

Fig. S1 <sup>1</sup>H NMR spectrum of compound A in CDCl<sub>3</sub>.

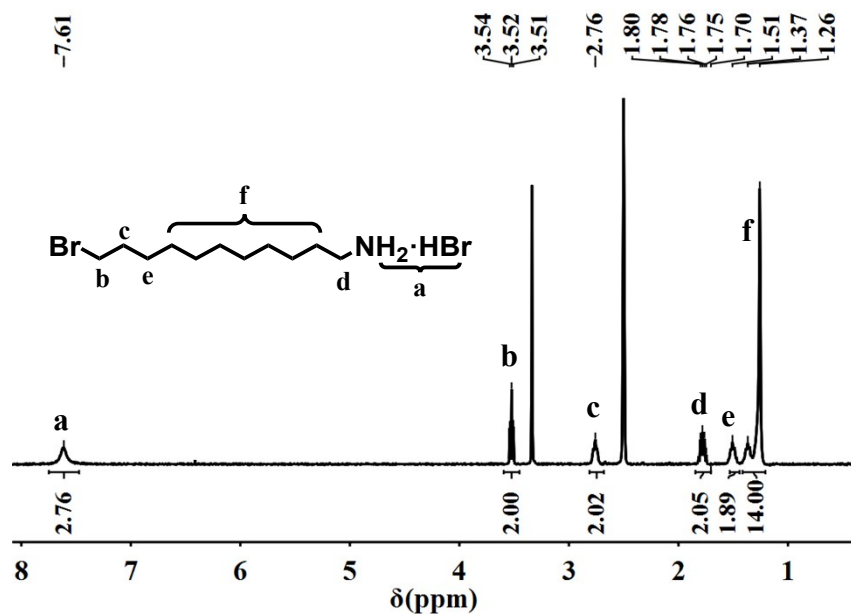

Fig. S2 <sup>1</sup>H NMR spectrum of compound E in DMSO-d<sub>6</sub>.

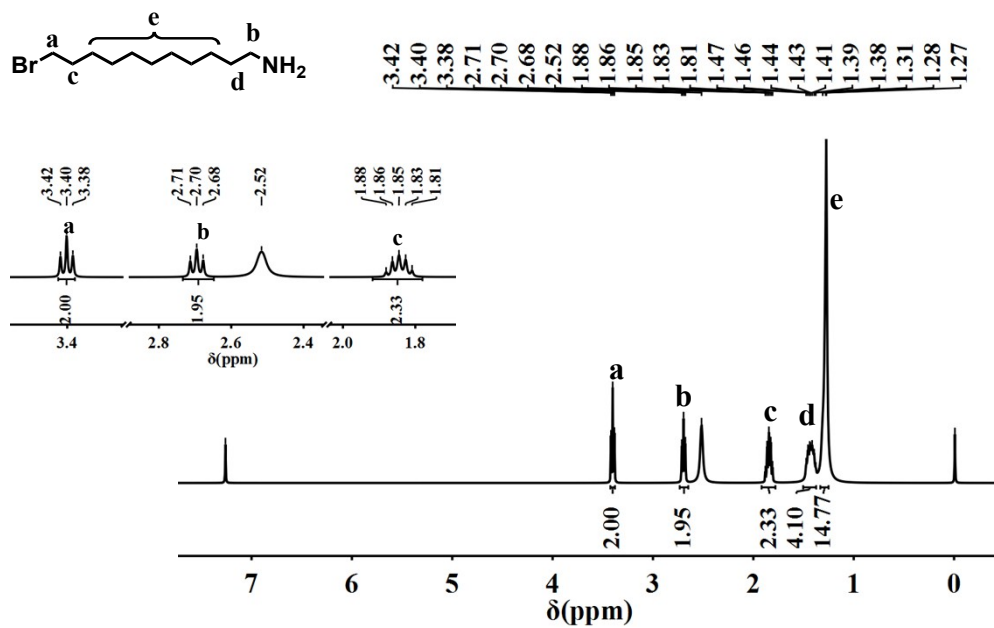

Fig. S3 <sup>1</sup>H NMR spectrum of compound F in CDCl<sub>3</sub>.

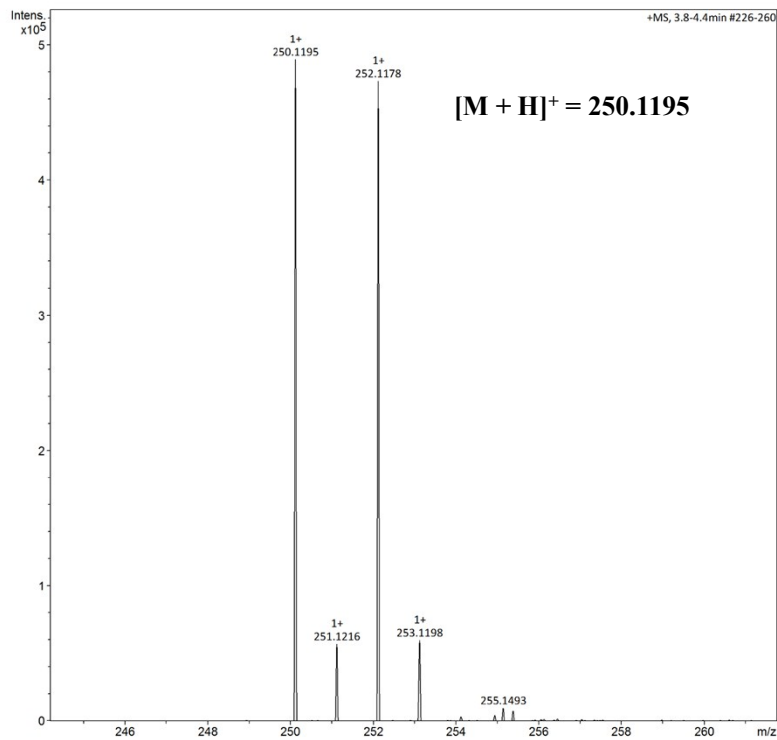

Fig. S4 ESI-MS spectrum of compound F.

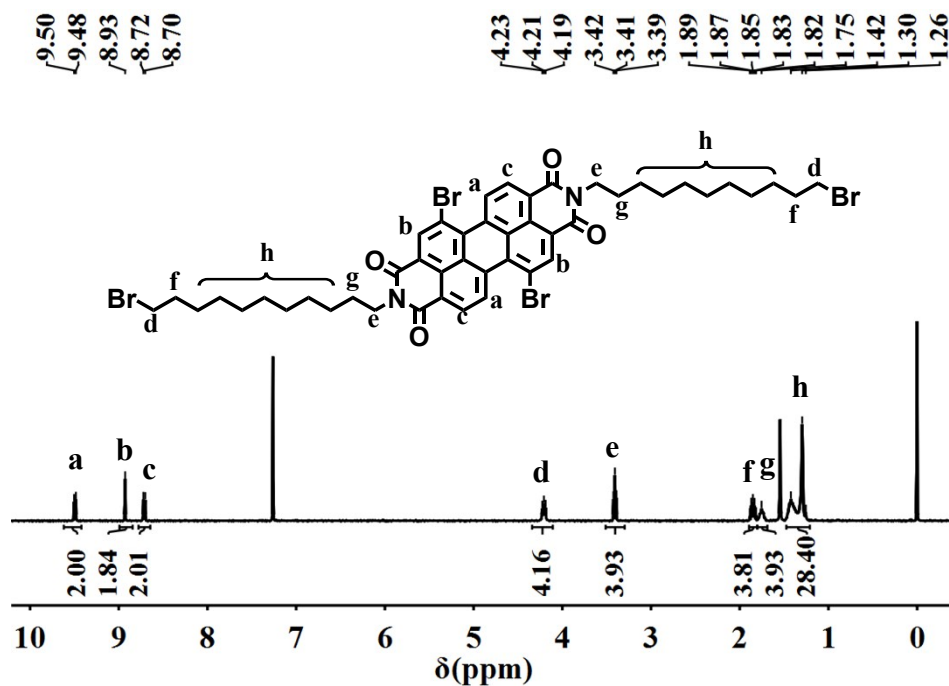

Fig. S5  $^1\text{H}$  NMR spectrum of compound H in  $\text{CDCl}_3$ .

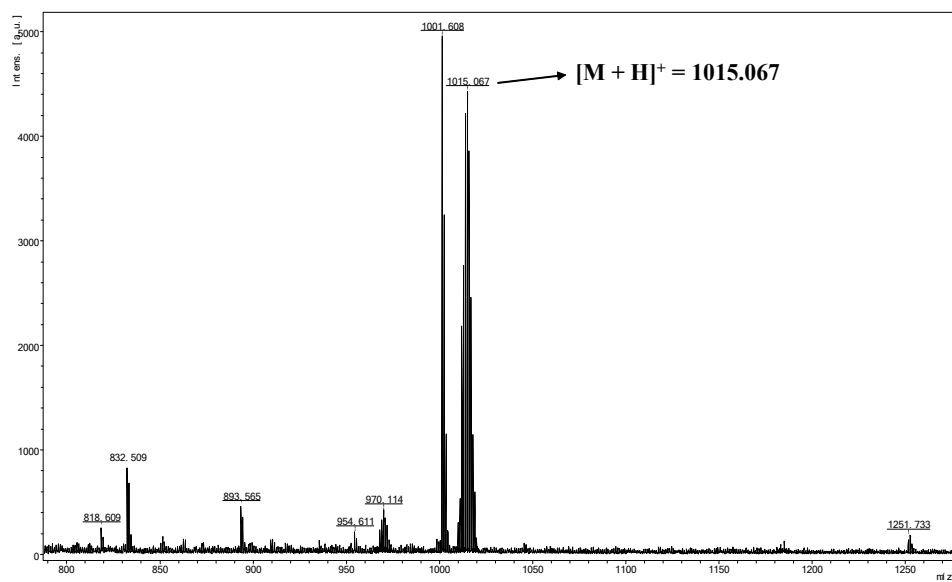

Fig. S6 MALDI-TOF-MS spectrum of compound H.

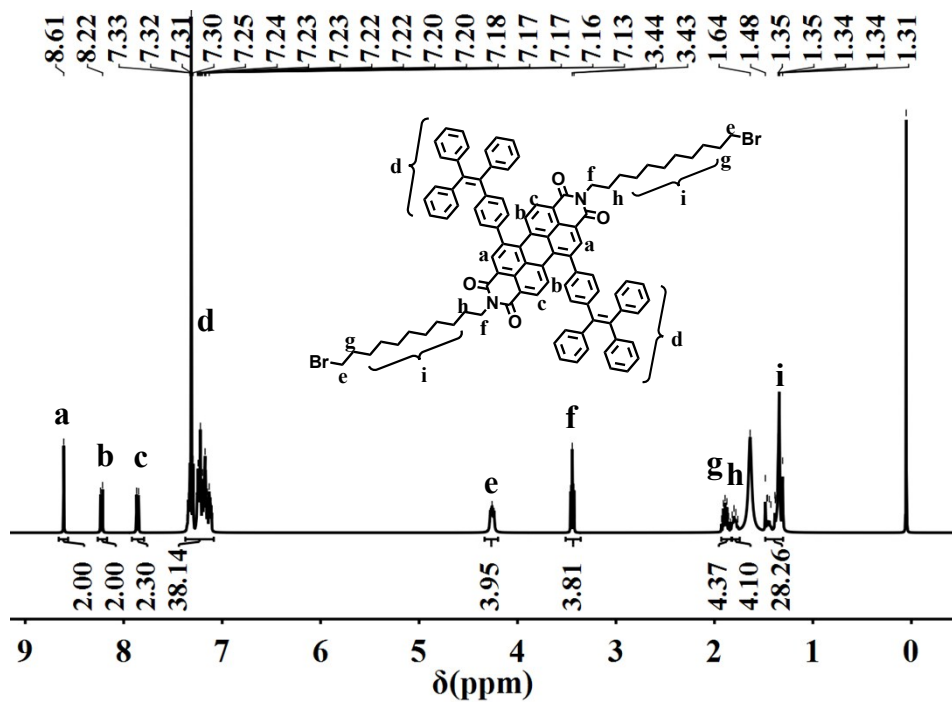

Fig. S7 <sup>1</sup>H NMR spectrum of compound J in CDCl<sub>3</sub>.

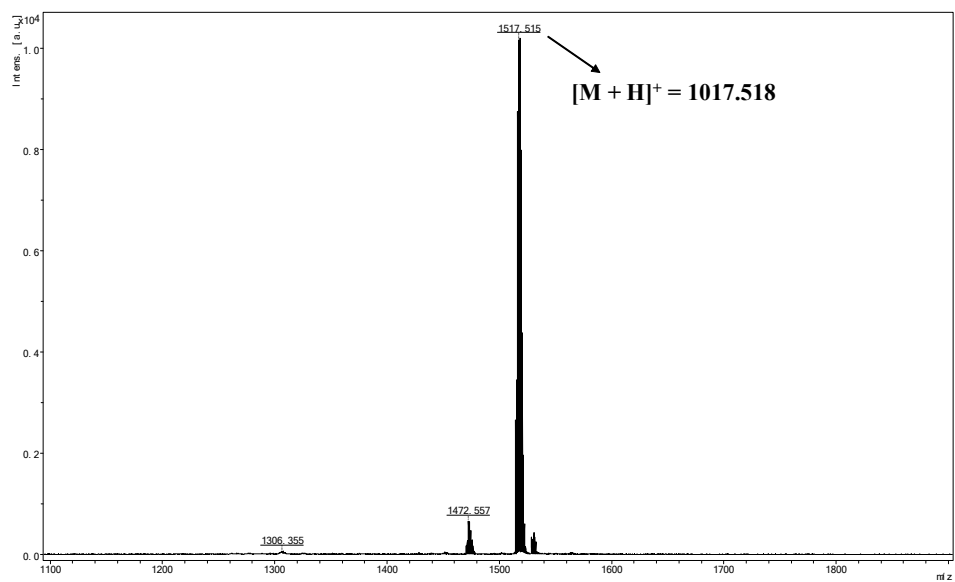

Fig. S8 MALDI-TOF-MS spectrum of compound J.

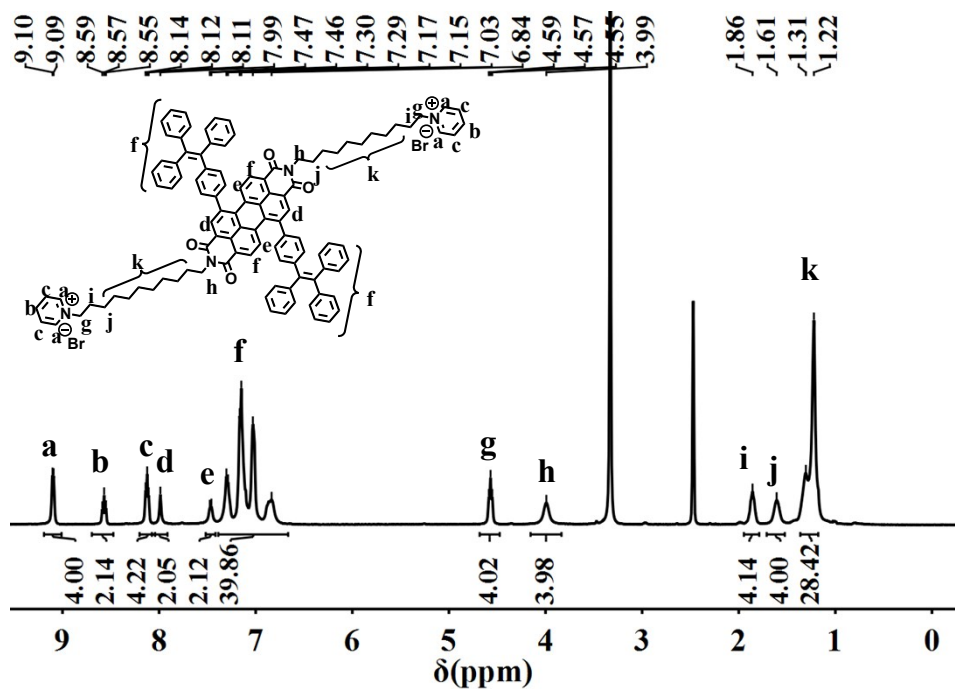

Fig. S9  $^1\text{H}$  NMR spectrum of PBI-TPE-11 in  $\text{DMSO-d}_6$ .

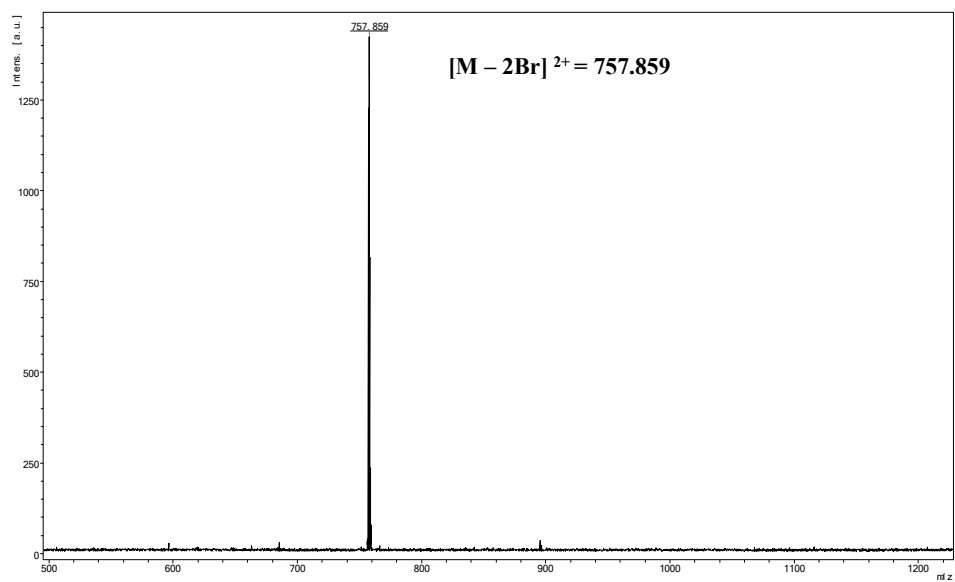

**Fig. S10** MALDI-TOF-MS spectrum of PBI-TPE-11.

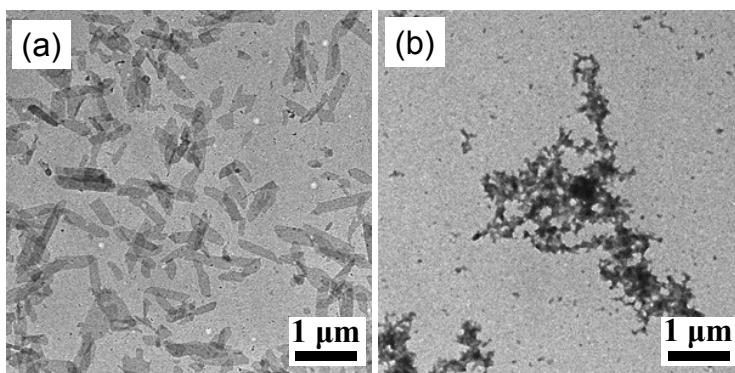

**Fig. S11** TEM images of (a) PBI-TPE-11 and (b) PBI-TPE-11 in presence of 2-fold SDBS.

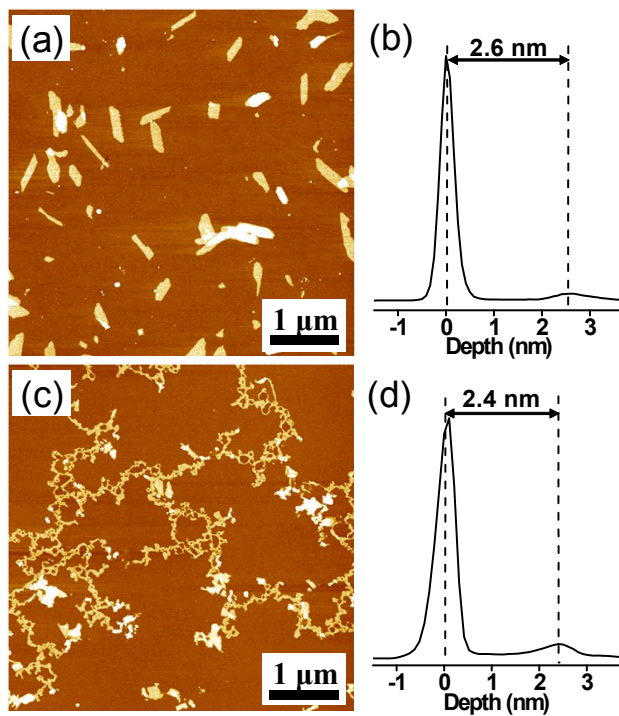

**Fig. S12** (a, c) The AFM images of PBI-TPE-11 and (b, d) corresponding depth analysis in absence and presence of 2-fold SDBS of PBI-TPE-11.

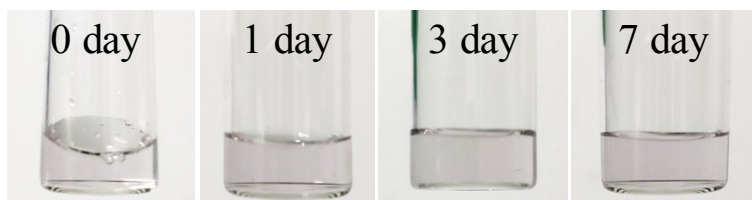

**Fig. S13** Photographs of the PBI-TPE-11/SDBS solution taken at different time.
